# Supplementary material
Source: PubMed Central journal article supplement (PMC2675959)
Supplement: me.2008-0465_1.pdf [file me.2008-0465_1.pdf]

**Supplemental Table 1.** Nuclear receptor nomenclature.

| Common name                                                                                             | Common abbreviation | Database name |                   |
|---------------------------------------------------------------------------------------------------------|---------------------|---------------|-------------------|
|                                                                                                         |                     | NRNC*         | HUGO <sup>†</sup> |
| Androgen receptor                                                                                       | AR                  | NR3C4         | AR                |
| Constitutive androstane receptor                                                                        | CAR                 | NR1I3         | NR1I3             |
| Chicken ovalbumin upstream promoter-transcription factor alpha                                          | COUP-TF $\alpha$    | NR2F1         | NR2F1             |
| Chicken ovalbumin upstream promoter-transcription factor beta                                           | COUP-TF $\beta$     | NR2F2         | NR2F2             |
| Chicken ovalbumin upstream promoter-transcription factor gamma                                          | COUP-TF $\gamma$    | NR2F6         | NR2F6             |
| Dosage-sensitive sex reversal-adrenal hypoplasia congenital critical region on the X chromosome, gene 1 | DAX-1               | NR0B1         | NR0B1             |
| Estrogen receptor alpha                                                                                 | ER $\alpha$         | NR3A1         | ESR1              |
| Estrogen receptor beta                                                                                  | ER $\beta$          | NR3A2         | ESR2              |
| Estrogen-related receptor alpha                                                                         | ERR $\alpha$        | NR3B1         | ESRRA             |
| Estrogen-related receptor beta                                                                          | ERR $\beta$         | NR3B2         | ESRRB             |
| Estrogen-related receptor gamma                                                                         | ERR $\gamma$        | NR3B3         | ESRRG             |
| Farnesoid X receptor alpha                                                                              | FXR $\alpha$        | NR1H4         | NR1H4             |
| Farnesoid X receptor beta                                                                               | FXR $\beta$         | NR1H5         | NR1H5P            |
| Germ cell nuclear factor                                                                                | GCNF                | NR6A1         | NR6A1             |
| Glucocorticoid receptor                                                                                 | GR                  | NR3C1         | NR3C1             |
| Hepatocyte nuclear factor 4 alpha                                                                       | HNF4 $\alpha$       | NR2A1         | HNF4A             |
| Hepatocyte nuclear factor 4 gamma                                                                       | HNF4 $\gamma$       | NR2A2         | HNF4G             |
| Liver receptor homolog-1                                                                                | LRH-1               | NR5A2         | NR5A2             |
| Liver X receptor alpha                                                                                  | LXR $\alpha$        | NR1H3         | NR1H3             |
| Liver X receptor beta                                                                                   | LXR $\beta$         | NR1H2         | NR1H2             |
| Mineralocorticoid receptor                                                                              | MR                  | NR3C2         | NR3C2             |
| Nerve growth factor induced gene B                                                                      | NGFIB               | NR4A1         | NR4A1             |
| Neuron-derived orphan receptor 1                                                                        | NOR1                | NR4A3         | NR4A3             |
| Nur-related factor 1                                                                                    | NURR1               | NR4A2         | NR4A2             |
| Photoreceptor cell-specific nuclear receptor                                                            | PNR                 | NR2E3         | NR2E3             |
| Peroxisome proliferator-activated receptor alpha                                                        | PPAR $\alpha$       | NR1C1         | PPARA             |
| Peroxisome proliferator-activated receptor beta                                                         | PPAR $\delta$       | NR1C2         | PPARD             |
| Peroxisome proliferator-activated receptor gamma                                                        | PPAR $\gamma$       | NR1C3         | PPARG             |
| Progesterone receptor                                                                                   | PR                  | NR3C3         | PGR               |
| Pregnane X receptor                                                                                     | PXR                 | NR1I2         | NR1I2             |
| Retinoic acid receptor alpha                                                                            | RAR $\alpha$        | NR1B1         | RARA              |
| Retinoic acid receptor beta                                                                             | RAR $\beta$         | NR1B2         | RARB              |
| Retinoic acid receptor gamma                                                                            | RAR $\gamma$        | NR1B3         | RARG              |
| Reverse-erb alpha                                                                                       | REV-ERB $\alpha$    | NR1D1         | NR1D1             |
| Reverse-erb beta                                                                                        | REV-ERB $\beta$     | NR1D2         | NR1D2             |
| Retinoic acid-related orphan receptor alpha                                                             | ROR $\alpha$        | NR1F1         | RORA              |
| Retinoic acid-related orphan receptor beta                                                              | ROR $\beta$         | NR1F2         | RORB              |
| Retinoic acid-related orphan receptor gamma                                                             | ROR $\gamma$        | NR1F3         | RORC              |
| Retinoid X receptor alpha                                                                               | RXR $\alpha$        | NR2B1         | RXRA              |
| Retinoid X receptor beta                                                                                | RXR $\beta$         | NR2B2         | RXRB              |
| Retinoid X receptor gamma                                                                               | RXR $\gamma$        | NR2B3         | RXRG              |
| Steroidogenic factor 1                                                                                  | SF1                 | NR5A1         | NR5A1             |

**Supplemental Table 1 (continued).** Nuclear receptor nomenclature.

| Common name                      | Common abbreviation | Nomenclature |                   |
|----------------------------------|---------------------|--------------|-------------------|
|                                  |                     | NRNC*        | HUGO <sup>†</sup> |
| Small heterodimeric partner      | SHP                 | NR0B2        | NR0B2             |
| Tailless homolog orphan receptor | TLX                 | NR2E1        | NR2E1             |
| Testicular orphan receptor 2     | TR2                 | NR2C1        | NR2C1             |
| Testicular orphan receptor 4     | TR4                 | NR2C2        | NR2C2             |
| Thyroid hormone receptor alpha   | TR $\alpha$         | NR1A1        | THRA              |
| Thyroid hormone receptor beta    | TR $\beta$          | NR1A2        | THRB              |
| Vitamin D receptor               | VDR                 | NR1H1        | VDR               |

\*: Nuclear Receptor Nomenclature Committee

<sup>†</sup>: Human Genome Organization
