# Supplementary material
Source: PubMed Central journal article supplement (PMC2675959)
Supplement: me.2008-0465_2.pdf [file me.2008-0465_2.pdf]

**Supplemental Table 2.** Human nuclear receptor primers and probes used for QPCR assays.

| Receptor         | Formal mRNA Name | Accession #                                      | QPCR Primers                                                                    | TaqMan Probe               |
|------------------|------------------|--------------------------------------------------|---------------------------------------------------------------------------------|----------------------------|
| 18S              |                  | X00686                                           | 5' accgcagctaggaataatgga3'<br>5' gcctcagttccgaaaacca3'                          | VIC-accgcggttctat          |
| AR               | NR3C4            | NM_000044                                        | (3525)5' gaattcctgtgcatgaaagca3'<br>(3610)5' cgaagttgatgaaagaatTTTTGATT3'       | 6FAM-ctactcttcagcattattcca |
| CAR              | NR1I3            | NM_005122                                        | (771)5' ttcatggtactgcaagtcataa3'<br>(856)5' ttgagaagggagatctggctctc3'           | 6FAM-ttactaaggacctgcccgtc  |
| COUP-TF $\alpha$ | NR2F1            | NM_005654                                        | (1053)5' acagctgcctcaaagccatc3'<br>(1167)5' tcacgtactcctccagtgcg3'              | 6FAM-cacatcgagagcctgcag    |
| COUP-TF $\beta$  | NR2F2            | NM_021005                                        | (1249)5' aaggcgctgcacggttgac3'<br>(1349)5' ctttccacatgggctacatcag3'             | 6FAM-tagtcctgtttcacctcagat |
| DAX              | NR0B1            | NM_000475                                        | (1068)5' ccaggtccaagccatcaagt3'<br>(1175)5' ggcacgtccgggttaaaga3'               | 6FAM-aggagtacgcctacctc     |
| COUP-TF $\gamma$ | NR2F6            | NM_005234                                        | (352)5' agggctgcaagagctTTTTc3'<br>(427)5' tggcagtcacgggttga3'                   | 6FAM-caacctcagctacacctg    |
| ER $\alpha$      | NR3A1            | NM_000125                                        | (989)5' agagaagtattcaaggacataacgactatat3'<br>(1066)5' tcttccctcctgTTTTTcaatgg3' | 6FAM-cagccaccaaccagt       |
| ER $\beta$       | NR3A2            | NM_001437                                        | (1316)5' aagttggccgacaaggagtt3'<br>(1391)5' acaggctgagctccacaaga3'              | 6FAM-ccaagaagattccc        |
| ERR $\alpha$     | NR3B1            | NM_004451                                        | (1143)5' gcgagaggagtatgTTTactaaagg3'<br>(1218)5' agcctcgcatcttcgat3'            | 6FAM-ccaattcagactctgtgcac  |
| ERR $\beta$      | NR3B2            | NM_004452                                        | (719)5' gaggactatccaaggaacattg3'<br>(839)5' catccccactttgaggcatt3'              | 6FAM-cgagatcaccaaaccg      |
| ERR $\gamma$     | NR3B3            | NM_001438                                        | (182)5' gctaacactgtcgcagtttgaa3'<br>(357)5' cgaacagctggaatcaatgtg3'             | 6FAM-tctgcagaatgtcaaaca    |
| FXR              | NR1H4            | NM_005123                                        | (897)5' tgtcgactaaggaaatgcaaaga3'<br>(997)5' tgctgcttcacatTTTTTctca3'           | 6FAM-cttgtaactgaaattca     |
| GCNF             | NR6A1            | NM_033334<br>NM_001489<br>NM_001489<br>NM_033335 | (1279)5' atcgagcggctcatctacct3'<br>(1379)5' atatcttgatttaggaagTTAattgctttc3'    | 6FAM-agttccatcagctaaag     |
| GR               | NR3C1            | NM_000176                                        | (1280)5' tcctgggtcgaacagttTTTT3'<br>(1357)5' agctggatggaggagagctt3'             | 6FAM-ccagcatgagaccagat     |
| HNF4 $\alpha$    | NR2A1            | NM_000457                                        | (536)5' tgcaggctcaagaaatgctt3'<br>(591)5' tcattctggacggcttccct3'                | 6FAM-catgccagcccga         |
| HNF4 $\gamma$    | NR2A2            | NM_004133                                        | (360)5' tgggtgcaagggttctc3'<br>(426)5' ccgactgaacctgcaagaata3'                  | 6FAM-cagcattcgtaagagtcaca  |
| LRH-1            | NR5A2            | NM_003822                                        | (469)5' cagagaaagcgttgtccttactg3'<br>(569)5' ttattccttccctccacgcatt3'           | 6FAM-tcggcccttacagcttct    |
| LXR $\alpha$     | NR1H3            | NM_005693                                        | 5' cccttcagaaccacagagatc3'<br>5' gctcgttccccagcatttt3'                          | 6FAM-ccacaaaagcggaaaa      |
| LXR $\beta$      | NR1H2            | NM_007121                                        | (1099)5' cgctaagcaagtgcctgggt3'<br>(1199)5' gcctggctgtctctagcagc3'              | 6FAM-ccctcctgaaggcat       |
| MR               | NR3C2            | NM_000901                                        | (2775)5' ccaaatcagccttcagttcgt3'<br>(2876)5' ttgaggccatcctttggaat3'             | 6FAM-ttagtagcagcaaaactttca |
| NGFIB3           | NR4A1            | NM_173158                                        | (139)5' cccttcgtgctgggtgtct3'<br>(220)5' ggcttgatcacgggcatct3'                  | 6FAM-cctttttccagggtcaaa    |
| NOR1             | NR4A3            | NM_006981<br>NM_173198<br>NM_173199<br>NM_173200 | (1741)5' aagagacgtcgaaaccgatgt3'<br>(1833)5' tttcagactatctgtacggacaacttc3'      | 6FAM-taccattccaacactgag    |
| NURR1            | NR4A2            | NM_006186                                        | (1625)5' gcccaaagccgaccaa3'<br>(1700)5' ggacctgtatgctaatacgaagga3'              | 6FAM-ctgctttttgaaatcagct   |

| Receptor         | Name  | Formal mRNA Accession | # QPCR Primers                                                             | TaqMan Probe               |
|------------------|-------|-----------------------|----------------------------------------------------------------------------|----------------------------|
| PNR              | NR2E3 | NM_016346             | (456) 5' tgtgccccgctggacaa3'                                               | 6FAM-acttcttcagccgg        |
|                  |       | NM_014249             | (542) 5' cggcgtcctggttcatc3'                                               |                            |
| PPAR $\alpha$    | NR1C1 | NM_005036             | (148) 5' acgtgcttctgcttcatagat3'<br>(218) 5' caccatcgcgaccagatg3'          | 6FAM-agctcggcgacacaa       |
| PPAR $\delta$    | NR1C2 | NM_006238             | 5' cagtactgccgcttccagaa3'                                                  | 6FAM-catgtcacacaacgctat    |
|                  |       | NM_177435             | 5' ggccatccgacaaaacg3'                                                     |                            |
| PPAR $\delta$ 2  |       | NM_177435             | (128) 5' ccaacagatgaagacagatgca3'<br>(197) 5' ctgaacgcagatggacctcta3'      | 6FAM-tgatgggaaccacc        |
| PPAR $\gamma$    | NR1C3 | NM_005037             | 5' agatccagtggttgacagattaca3'                                              | 6FAM-tcaagagtaccaaagtga    |
|                  |       | NM_015869             | 5' ggagatgcaggctccacttt3'                                                  |                            |
| PPAR $\gamma$ 2  |       | NM_015869             | (163) 5' tgaccagaaaagcgattcct3'<br>(263) 5' caaagttggtgggccagaa3'          | 6FAM-tatagcacaccatcccca    |
| PR               | NR3C3 | NM_000926             | (1927) 5' tgggagctgtaaggtcttctttaa3'<br>(2007) 5' acgatgcagtcatttcttcca3'  | 6FAM-aagggcagcacaact       |
| PXR              | NR1I2 | NM_003889             | (2984) 5' cccagcctgctcataggttc3'<br>(3064) 5' ggggtgctgagcattgatg3'        | 6FAM-catggctatgctcaccgag   |
| RAR $\alpha$     | NR1B1 | NM_000964             | 5' cagcaccagcttccagttagt3'<br>5' ctgctgctctgggtctcaatg3'                   | 6FAM-tatagcacaccatcccca    |
| RAR $\beta$      | NR1B2 | NM_000965             | (1390) 5' cagctcctgcctttggaaa3'                                            | 6FAM-ttaatctgtggagaccgcca  |
|                  |       | NM_016152             | (1489) 5' cttttgtcggttcctcaaggt3'                                          |                            |
| RAR $\gamma$     | NR1B3 | NM_000966             | 5' ggaacaagaagaagaagaggtgaa3'<br>5' ttggtgatgagctcttctaactga3'             | 6FAM-cctgacagctatgagc      |
| Rev-erb $\alpha$ | NR1D1 | NM_021724             | (2025) 5' tgaccaagtccacctgcttaag3'<br>(2083) 5' aagcaaagcgcaccatca3'       | 6FAM-cacctcaaaggtgccag     |
| Rev-erb $\beta$  | NR1D2 | NM_005126             | (773) 5' tcagcaatgtcacttcaaaa3'<br>(835) 5' ccaaaccgaacagcatctctt3'        | 6FAM-acattccaacagacagaca   |
| ROR $\alpha$     | NR1F1 | NM_134261             | 5' ctgactgaagatgaaattgcattatt3'<br>5' gcagccatgagcgatctg3'                 | 6FAM-ctgcatttgtactgatgtc   |
| ROR $\beta$      | NR1F2 | NM_006914             | (1186) 5' ttcaacaatgggcagttagca3'<br>(1266) 5' ccaaattgggacttaatgatgttct3' | 6FAM-ccatgactgaaatcgaccga  |
| ROR $\gamma$     | NR1F3 | NM_005060             | (951) 5' gcagcgtccaacatcttc3'<br>(1031) 5' gcacaccgttcccacatct3'           | 6FAM-cacatggacttctctggtag  |
| RXR $\alpha$     | NR2B1 | NM_002957             | (795) gagcccaagaccgagacct3'<br>(895) agctgtttgtcggctgctt3'                 | 6FAM-ccagctcgcgaac         |
| RXR $\beta$      | NR2B2 | NM_021976             | (654) 5' agccccagattaactcaaca3'<br>(800) 5' gattgcacatagccgtttgc3'         | 6FAM-atgtgaagccaccagtct    |
| RXR $\gamma$     | NR2B3 | NM_006917             | (215) 5' gaagtttcccgcaggtatg3'<br>(278) 5' tgatgggctcatggatgtaga3'         | 6FAM-aggctcccctggcc        |
| SF-1             | NR5A1 | NM_004959             | (386) 5' ttctgccgcttccagaaat3'<br>(486) 5' ttgtacatcgccccaaactt3'          | 6FAM-aagccgtgcgcgct        |
| SHP              | NR0B2 | NM_021969             | (529) 5' cctgcctgaaagggaccat3'<br>(605) 5' ctgcaggtgcccaatgtg3'            | 6FAM-ccaggcctccaagc        |
| TLX              | NR2E1 | NM_003269             | 5' tgatgctaacactctactggctgta3'<br>5' cagcttctgggaatctgtgtt3'               | 6FAM-cacgttcatgccag        |
| TR2              | NR2C1 | NM_003297             | (998) 5' gcagaccaacggtgatgttt3'<br>(1057) 5' ccaggattcaatgcttttgc3'        | 6FAM-aagggcatttgacactc     |
|                  |       | NM_003298             | (816) 5' gatgggcatgaaaatggaatc3'<br>(881) 5' ggtttctcccgttgacat3'          |                            |
| TR $\alpha$      | NR1A1 | NM_003250             | (1372) 5' cacggaagtggctctgctg3'<br>(1472) 5' gcaggtacgcctcctgactc3'        | 6FAM-taatgtcaacagaccgctc   |
| TR $\beta$       | NR1A2 | NM_000461             | (201) 5' tgcgtgggtgccaaagt3'<br>(264) 5' ccttttctactgacatctccttct3'        | 6FAM-ccacacatgatttaaatgaat |
| VDR              | NR1I1 | NM_000376             | (547) 5' cccacctaactccgacttct3'<br>(605) 5' ctccaccatcattcacagaa3'         | 6FAM-ccagttccggcctc        |
