# Supplementary material
Source: PubMed Central journal article supplement (PMC2675959)
Supplement: me.2008-0465_3.pdf [file me.2008-0465_3.pdf]

**Supplemental Table 3.** Ct values of NRs\* expressed in undifferentiated mouse and human ESCs.

| Human only<br>(H9) |    | Mouse only<br>(CMTI-1) |    | Common           |        |    |
|--------------------|----|------------------------|----|------------------|--------|----|
|                    |    |                        |    | H9               | CMTI-1 |    |
| HNF4 $\gamma$      | 30 | ERR $\beta$            | 22 | AR               | 31     | 30 |
| PPAR $\gamma$      | 30 | ERR $\gamma$           | 32 | COUP-TF $\alpha$ | 30     | 29 |
| PXR                | 29 | PNR                    | 32 | COUP-TF $\beta$  | 30     | 31 |
| ROR $\beta$        | 30 | PPAR $\alpha$          | 30 | COUP-TF $\gamma$ | 24     | 25 |
| TR $\beta$         | 30 | PR                     | 32 | DAX-1 †          | 31     | 25 |
|                    |    | ROR $\gamma$           | 32 | ERR $\alpha$     | 31     | 28 |
|                    |    | RXR $\gamma$           | 28 | GCNF             | 25     | 25 |
|                    |    | SHP                    | 32 | GR               | 26     | 26 |
|                    |    |                        |    | HNF4 $\alpha$    | 29     | 31 |
|                    |    |                        |    | LRH-1 †          | 29     | 25 |
|                    |    |                        |    | LXR $\alpha$     | 29     | 30 |
|                    |    |                        |    | LXR $\beta$      | 24     | 22 |
|                    |    |                        |    | MR               | 31     | 29 |
|                    |    |                        |    | NGFI-B †         | 30     | 26 |
|                    |    |                        |    | NOR1             | 32     | 31 |
|                    |    |                        |    | NURR1            | 32     | 31 |
|                    |    |                        |    | PPAR $\delta$    | 27     | 26 |
|                    |    |                        |    | RAR $\alpha$     | 26     | 24 |
|                    |    |                        |    | RAR $\beta$      | 30     | 27 |
|                    |    |                        |    | RAR $\gamma$ †   | 25     | 21 |
|                    |    |                        |    | REV-ERB $\alpha$ | 28     | 26 |
|                    |    |                        |    | REV-ERB $\beta$  | 28     | 25 |
|                    |    |                        |    | ROR $\alpha$     | 29     | 29 |
|                    |    |                        |    | RXR $\alpha$     | 28     | 26 |
|                    |    |                        |    | RXR $\beta$ †    | 31     | 23 |
|                    |    |                        |    | TR2              | 26     | 27 |
|                    |    |                        |    | TR4 †            | 30     | 24 |
|                    |    |                        |    | TR $\alpha$      | 27     | 27 |
|                    |    |                        |    | VDR              | 32     | 32 |

\* The following NRs were below detection (Ct > 33) in all cell lines: CAR, ER $\alpha$ , ER $\beta$ , FXR, SF1, TLX.

† Common NRs whose expression varied >10-fold between species.
