# Supplementary material
Source: PubMed Central journal article supplement (PMC2675959)
Supplement: me.2008-0465_4.pdf [file me.2008-0465_4.pdf]

**Supplemental Table 4.** Stem cell marker primers used for QPCR assays.

| Gene                 | Primer Sequence                                                          | Annealing T <sub>m</sub> (°C) | Product Size (bp) |
|----------------------|--------------------------------------------------------------------------|-------------------------------|-------------------|
| Human <i>OCT4</i>    | Forward:5'-GAAGGTATTCAGCCAAACGA-3'<br>Reverse:5'-AAATTCTCCAGGTTGCCTCT-3' | 60                            | 216               |
| Human <i>NANOG</i>   | Forward:5'-ACCAGACCTGGAACAATTCA-3'<br>Reverse:5'-ATGCAGGACTGCAGAGATTC-3' | 60                            | 163               |
| Human <i>AFP</i>     | Forward:5'-GGCCTCTTCCAGAACTAGG-3'<br>Reverse:5'-CCACAGGCCAATAGTTTGTC-3'  | 58                            | 170               |
| Human <i>NESTIN</i>  | Forward:5'-CATGGAACCTGGAGAATTTG-3'<br>Reverse:5'-AGCCAGTTCTTGGTCCTTCT-3' | 58                            | 197               |
| Human <i>GATA2</i>   | Forward:5'-AGACGACAACCACCACCTTA-3'<br>Reverse:5'-ATGCACTTTGACAGCTCCTC-3' | 58                            | 205               |
| Human <i>KERATIN</i> | Forward:5'-CTGTGTGCTACCAGTGCAAG-3'<br>Reverse:5'-CCTGGGTCTTGGGATATTCT-3' | 62                            | 212               |
| Mouse <i>Oct4</i>    | Forward:5'-AAGCAACTCAGAGGGAACCT-3'<br>Reverse:5'-GGTGATCCTCTTCTGCTTCA-3' | 60                            | 160               |
| Mouse <i>Nanog</i>   | Forward:5'-GATGCAAGAACTCTCCTCCA-3'<br>Reverse:5'-CAATGGATGCTGGGATACTC-3' | 60                            | 168               |
| Mouse <i>Afp</i>     | Forward:5'-TAACCTGGTGAAGCAAAAGC-3'<br>Reverse:5'-TTAAGCCAAAAGGCTCACAC-3' | 60                            | 235               |
| Mouse <i>Nestin</i>  | Forward:5'-CCGGAGAGGGAGCAGCACCAA-3'<br>Reverse:5'-GGCCTCCCCACAGCATCCT-3' | 60                            | 243               |
| Mouse <i>Gata2</i>   | Forward:5'-AGACGACAACCACCACCTTA-3'<br>Reverse:5'-CTCTTCTTGGATTTGCTGGA-3' | 60                            | 163               |
| Mouse <i>Keratin</i> | Forward:5'-TCTTGCTGAAGAACCATTCC-3'<br>Reverse:5'-TGAAGAAGAACCACGAGGAG-3' | 60                            | 183               |
| 18S RNA              | Forward:5'-GGAAGGGCACCACCAGGAGT-3'<br>Reverse:5'-TGCAGCCCCGGACATCTAAG-3' | 61                            | 317               |
